# Supplementary material for: Magnetic Anisotropy of Homo- and Heteronuclear Terbium(III) and Dysprosium(III) Trisphthalocyaninates Derived from Paramagnetic 1H-NMR Investigation
Source: MDPI journal article supplement (doi:10.3390/molecules29020510), 2024-01-19
Supplement: s1 [file s1]

# Magnetic Anisotropy of Homo- and Heteronuclear Terbium (III) and Dysprosium(III) Trisphthalocyaninates Derived from Paramagnetic $^1\text{H}$ -NMR Investigation

Ilya D. Kormschikov, Marina A. Polovkova, Gayane A. Kirakosyan <sup>2,3</sup>, Alexander G. Martynov <sup>2,\*</sup>, Yulia G. Gorbunova <sup>2,3</sup> and Aslan Yu. Tsivadze <sup>2,3</sup>

|                                                                                                                                                                                                                                                                                                                                                                                      |    |
|--------------------------------------------------------------------------------------------------------------------------------------------------------------------------------------------------------------------------------------------------------------------------------------------------------------------------------------------------------------------------------------|----|
| Figure S1. MALDI-TOF mass spectrum of $[\text{B}_4]\text{Dy}[\text{B}_4]\text{Y}[\text{C}_4]$ .                                                                                                                                                                                                                                                                                      | 2  |
| Figure S2. MALDI-TOF mass spectrum of $[\text{B}_4]\text{Y}[\text{B}_4]\text{Dy}[\text{C}_4]$ .                                                                                                                                                                                                                                                                                      | 2  |
| Figure S3. MALDI-TOF mass spectrum of $[\text{B}_4]\text{Dy}[\text{B}_4]\text{Dy}[\text{C}_4]$ .                                                                                                                                                                                                                                                                                     | 3  |
| Figure S4. MALDI-TOF mass spectrum of $[\text{B}_4]\text{Tb}[\text{B}_4]\text{Dy}[\text{C}_4]$ .                                                                                                                                                                                                                                                                                     | 3  |
| Figure S5. MALDI-TOF mass spectrum of $[\text{B}_4]\text{Dy}[\text{B}_4]\text{Tb}[\text{C}_4]$ .                                                                                                                                                                                                                                                                                     | 4  |
| Figure S6. Fragments of X-ray structures of $[\text{C}_4]\text{Yb}[\text{C}_4]\text{Y}(\text{Pc})\cdot 4\text{CHCl}_3\cdot 3\text{H}_2\text{O}$ and $[\text{B}_4]\text{Y}[\text{B}_4]\text{Y}[\text{C}_4]\cdot 10\text{CH}_2\text{Cl}_2$ , showing the analogy in localization of solvent molecules and contacts with substituents which stabilize staggered pairwise conformations. | 5  |
| Figure S7. $^1\text{H}$ -NMR spectrum of $[\text{B}_4]\text{Dy}[\text{B}_4]\text{Y}[\text{C}_4]$ in $\text{CDCl}_3$ .                                                                                                                                                                                                                                                                | 7  |
| Figure S8. $^1\text{H}$ - $^1\text{H}$ COSY spectrum of $[\text{B}_4]\text{Dy}[\text{B}_4]\text{Y}[\text{C}_4]$ in $\text{CDCl}_3$ .                                                                                                                                                                                                                                                 | 7  |
| Figure S9. $^1\text{H}$ -NMR spectrum of $[\text{B}_4]\text{Dy}[\text{B}_4]\text{Y}[\text{C}_4]$ in toluene- $d_8$ .                                                                                                                                                                                                                                                                 | 8  |
| Figure S10. $^1\text{H}$ - $^1\text{H}$ COSY spectrum of $[\text{B}_4]\text{Dy}[\text{B}_4]\text{Y}[\text{C}_4]$ in toluene- $d_8$ .                                                                                                                                                                                                                                                 | 8  |
| Figure S11. $^1\text{H}$ -NMR spectrum of $[\text{B}_4]\text{Y}[\text{B}_4]\text{Dy}[\text{C}_4]$ in $\text{CDCl}_3$ .                                                                                                                                                                                                                                                               | 9  |
| Figure S12. $^1\text{H}$ - $^1\text{H}$ COSY spectrum of $[\text{B}_4]\text{Y}[\text{B}_4]\text{Dy}[\text{C}_4]$ in $\text{CDCl}_3$ .                                                                                                                                                                                                                                                | 9  |
| Figure S13. $^1\text{H}$ -NMR spectrum of $[\text{B}_4]\text{Y}[\text{B}_4]\text{Dy}[\text{C}_4]$ in toluene- $d_8$ .                                                                                                                                                                                                                                                                | 10 |
| Figure S14. $^1\text{H}$ - $^1\text{H}$ COSY spectrum of $[\text{B}_4]\text{Y}[\text{B}_4]\text{Dy}[\text{C}_4]$ in toluene- $d_8$ .                                                                                                                                                                                                                                                 | 10 |
| Figure S15. $^1\text{H}$ -NMR spectrum of $[\text{B}_4]\text{Dy}[\text{B}_4]\text{Dy}[\text{C}_4]$ in $\text{CDCl}_3$ .                                                                                                                                                                                                                                                              | 11 |
| Figure S16. $^1\text{H}$ - $^1\text{H}$ COSY spectrum of $[\text{B}_4]\text{Dy}[\text{B}_4]\text{Dy}[\text{C}_4]$ in $\text{CDCl}_3$ .                                                                                                                                                                                                                                               | 11 |
| Figure S17. $^1\text{H}$ -NMR spectrum of $[\text{B}_4]\text{Dy}[\text{B}_4]\text{Dy}[\text{C}_4]$ in toluene- $d_8$ .                                                                                                                                                                                                                                                               | 12 |
| Figure S18. $^1\text{H}$ - $^1\text{H}$ COSY spectrum of $[\text{B}_4]\text{Dy}[\text{B}_4]\text{Dy}[\text{C}_4]$ in toluene- $d_8$ .                                                                                                                                                                                                                                                | 12 |
| Figure S19. $^1\text{H}$ -NMR spectrum of $[\text{B}_4]\text{Tb}[\text{B}_4]\text{Dy}[\text{C}_4]$ in $\text{CDCl}_3$ .                                                                                                                                                                                                                                                              | 13 |
| Figure S20. $^1\text{H}$ - $^1\text{H}$ COSY spectrum of $[\text{B}_4]\text{Tb}[\text{B}_4]\text{Dy}[\text{C}_4]$ in $\text{CDCl}_3$ .                                                                                                                                                                                                                                               | 13 |
| Figure S21. $^1\text{H}$ -NMR spectrum of $[\text{B}_4]\text{Tb}[\text{B}_4]\text{Dy}[\text{C}_4]$ in toluene- $d_8$ .                                                                                                                                                                                                                                                               | 14 |
| Figure S22. $^1\text{H}$ - $^1\text{H}$ COSY spectrum of $[\text{B}_4]\text{Tb}[\text{B}_4]\text{Dy}[\text{C}_4]$ in toluene- $d_8$ .                                                                                                                                                                                                                                                | 14 |
| Figure S23. $^1\text{H}$ -NMR spectrum of $[\text{B}_4]\text{Dy}[\text{B}_4]\text{Tb}[\text{C}_4]$ in $\text{CDCl}_3$ .                                                                                                                                                                                                                                                              | 15 |
| Figure S24. $^1\text{H}$ - $^1\text{H}$ COSY spectrum of $[\text{B}_4]\text{Dy}[\text{B}_4]\text{Tb}[\text{C}_4]$ in $\text{CDCl}_3$ .                                                                                                                                                                                                                                               | 15 |
| Figure S25. $^1\text{H}$ -NMR spectrum of $[\text{B}_4]\text{Dy}[\text{B}_4]\text{Tb}[\text{C}_4]$ in toluene- $d_8$ .                                                                                                                                                                                                                                                               | 16 |
| Figure S26. $^1\text{H}$ - $^1\text{H}$ COSY spectrum of $[\text{B}_4]\text{Dy}[\text{B}_4]\text{Tb}[\text{C}_4]$ in toluene- $d_8$ .                                                                                                                                                                                                                                                | 16 |

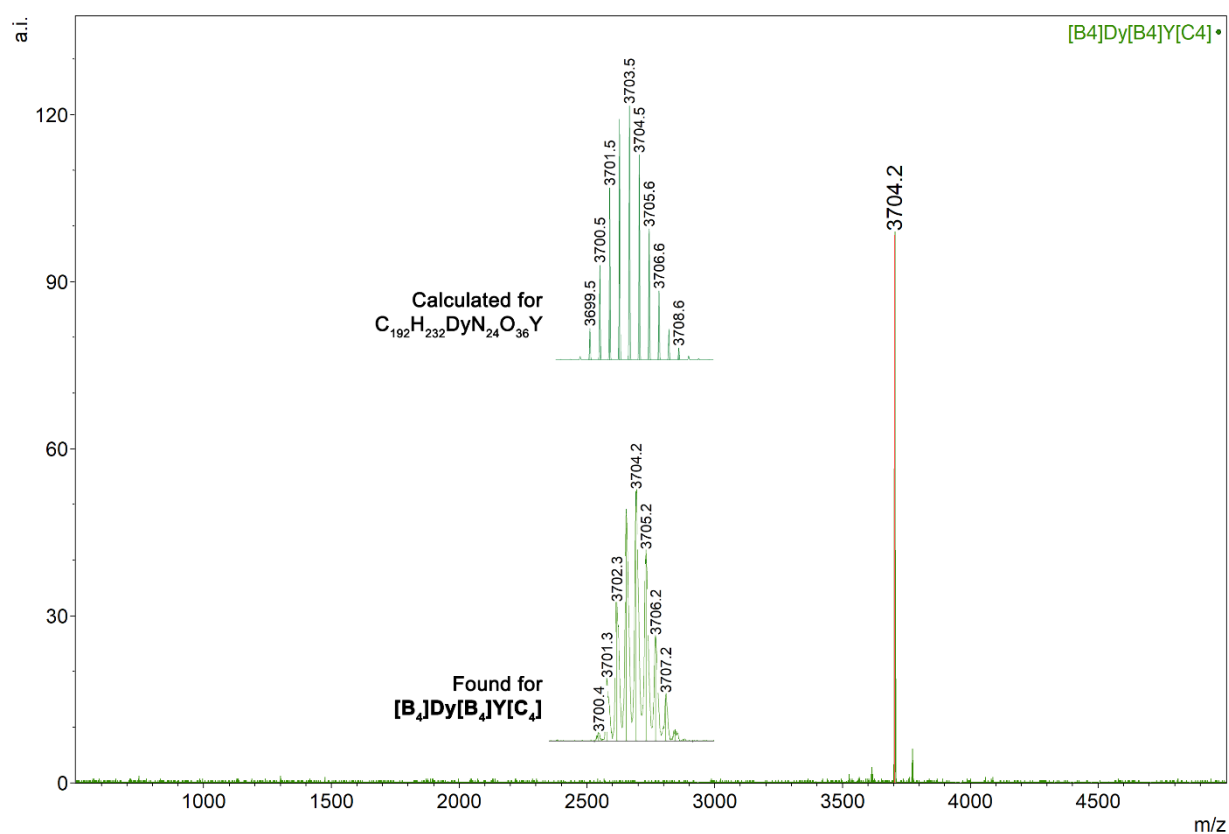Figure S1. MALDI-TOF mass spectrum of  $[B_4]Dy[B_4]Y[C_4]•$ .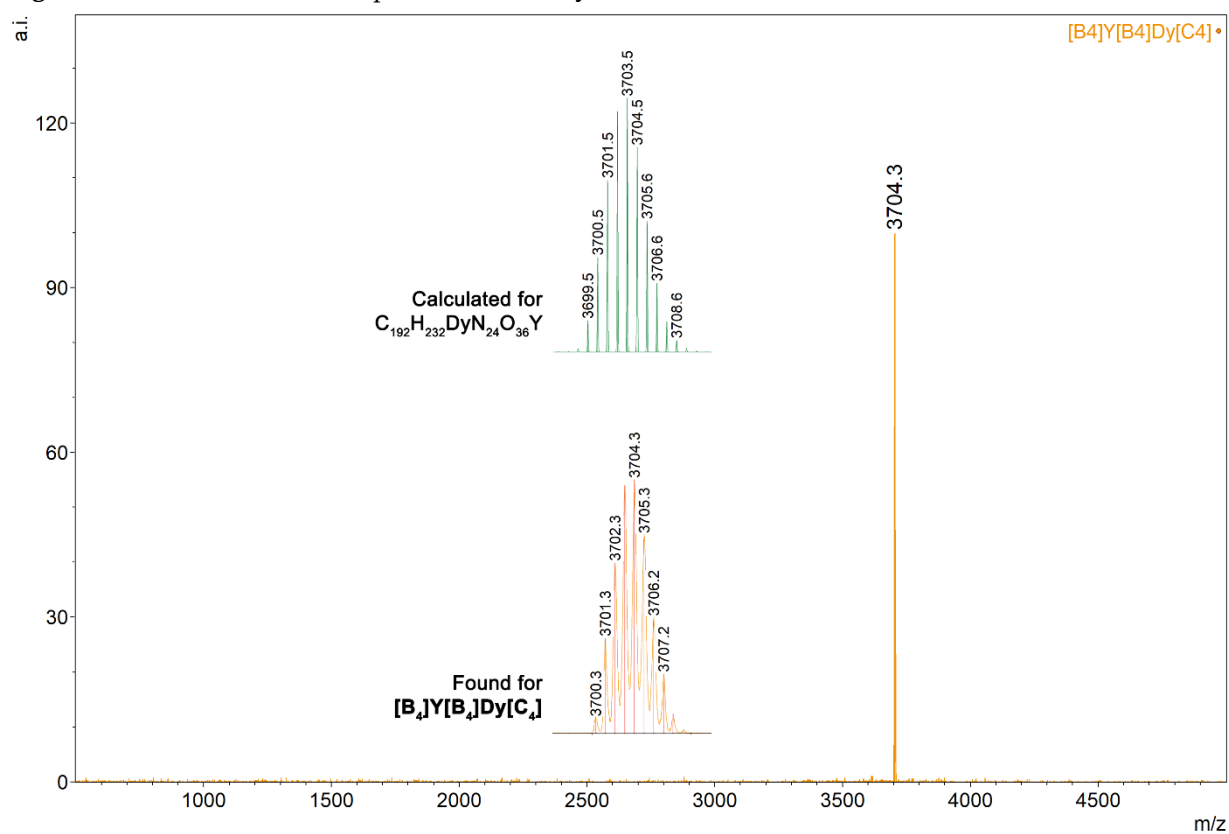Figure S2. MALDI-TOF mass spectrum of  $[B_4]Y[B_4]Dy[C_4]$ .

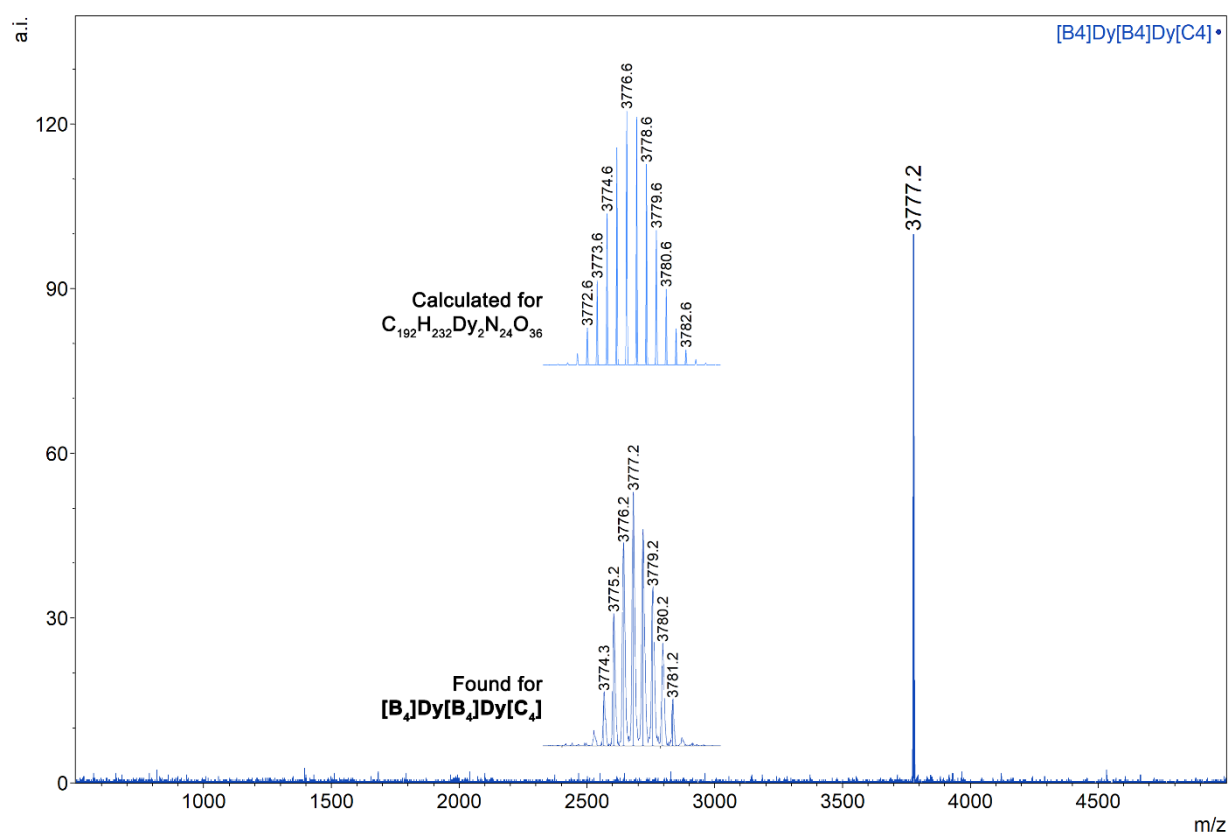Figure S3. MALDI-TOF mass spectrum of  $[B_4]Dy[B_4]Dy[C_4]$ .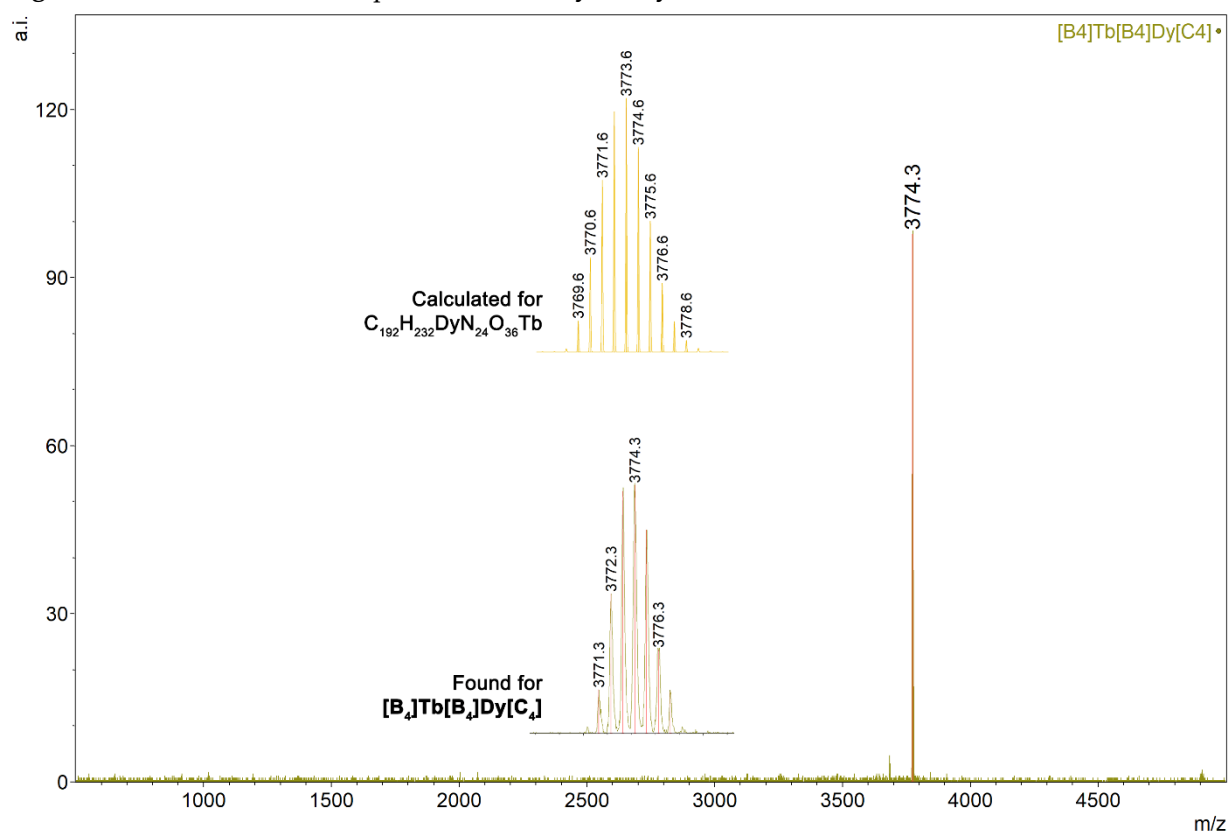Figure S4. MALDI-TOF mass spectrum of  $[B_4]Tb[B_4]Dy[C_4]$ .

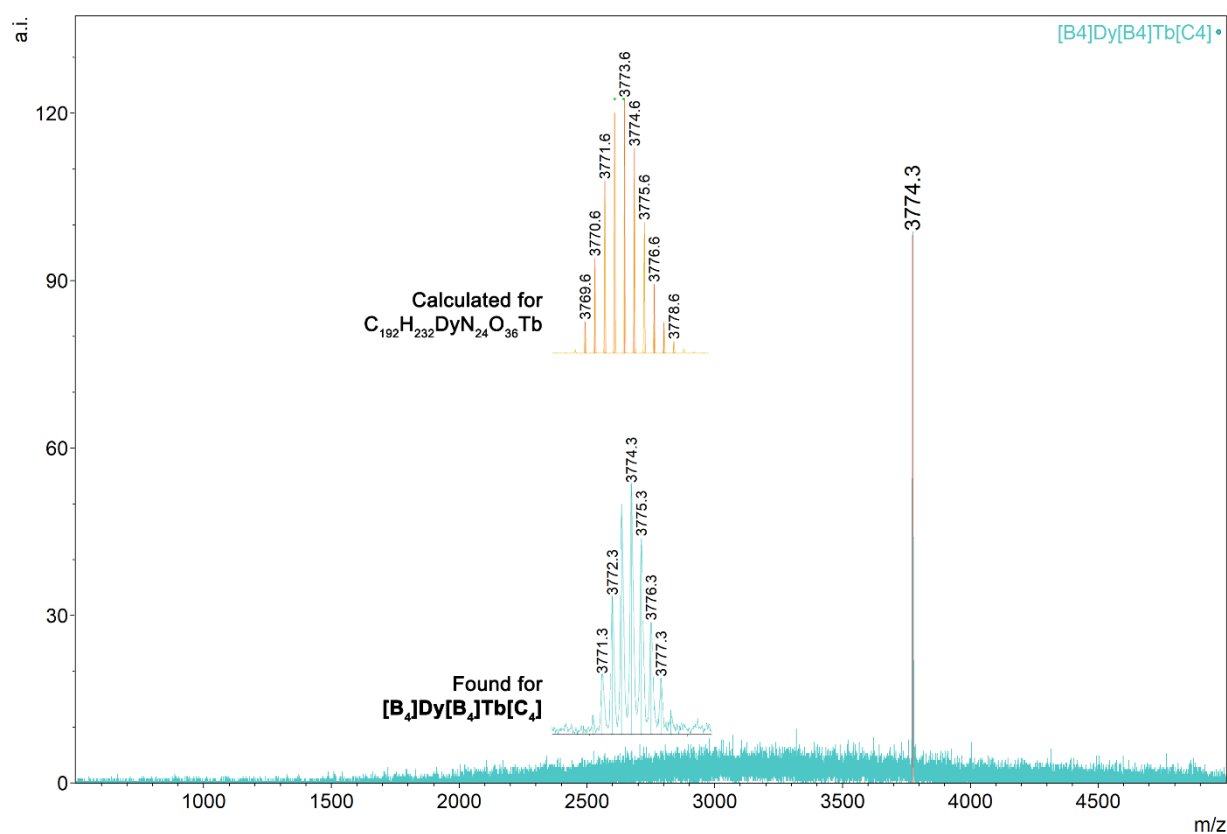

Figure S5. MALDI-TOF mass spectrum of  $[B_4]Dy[B_4]Tb[C_4]$ .

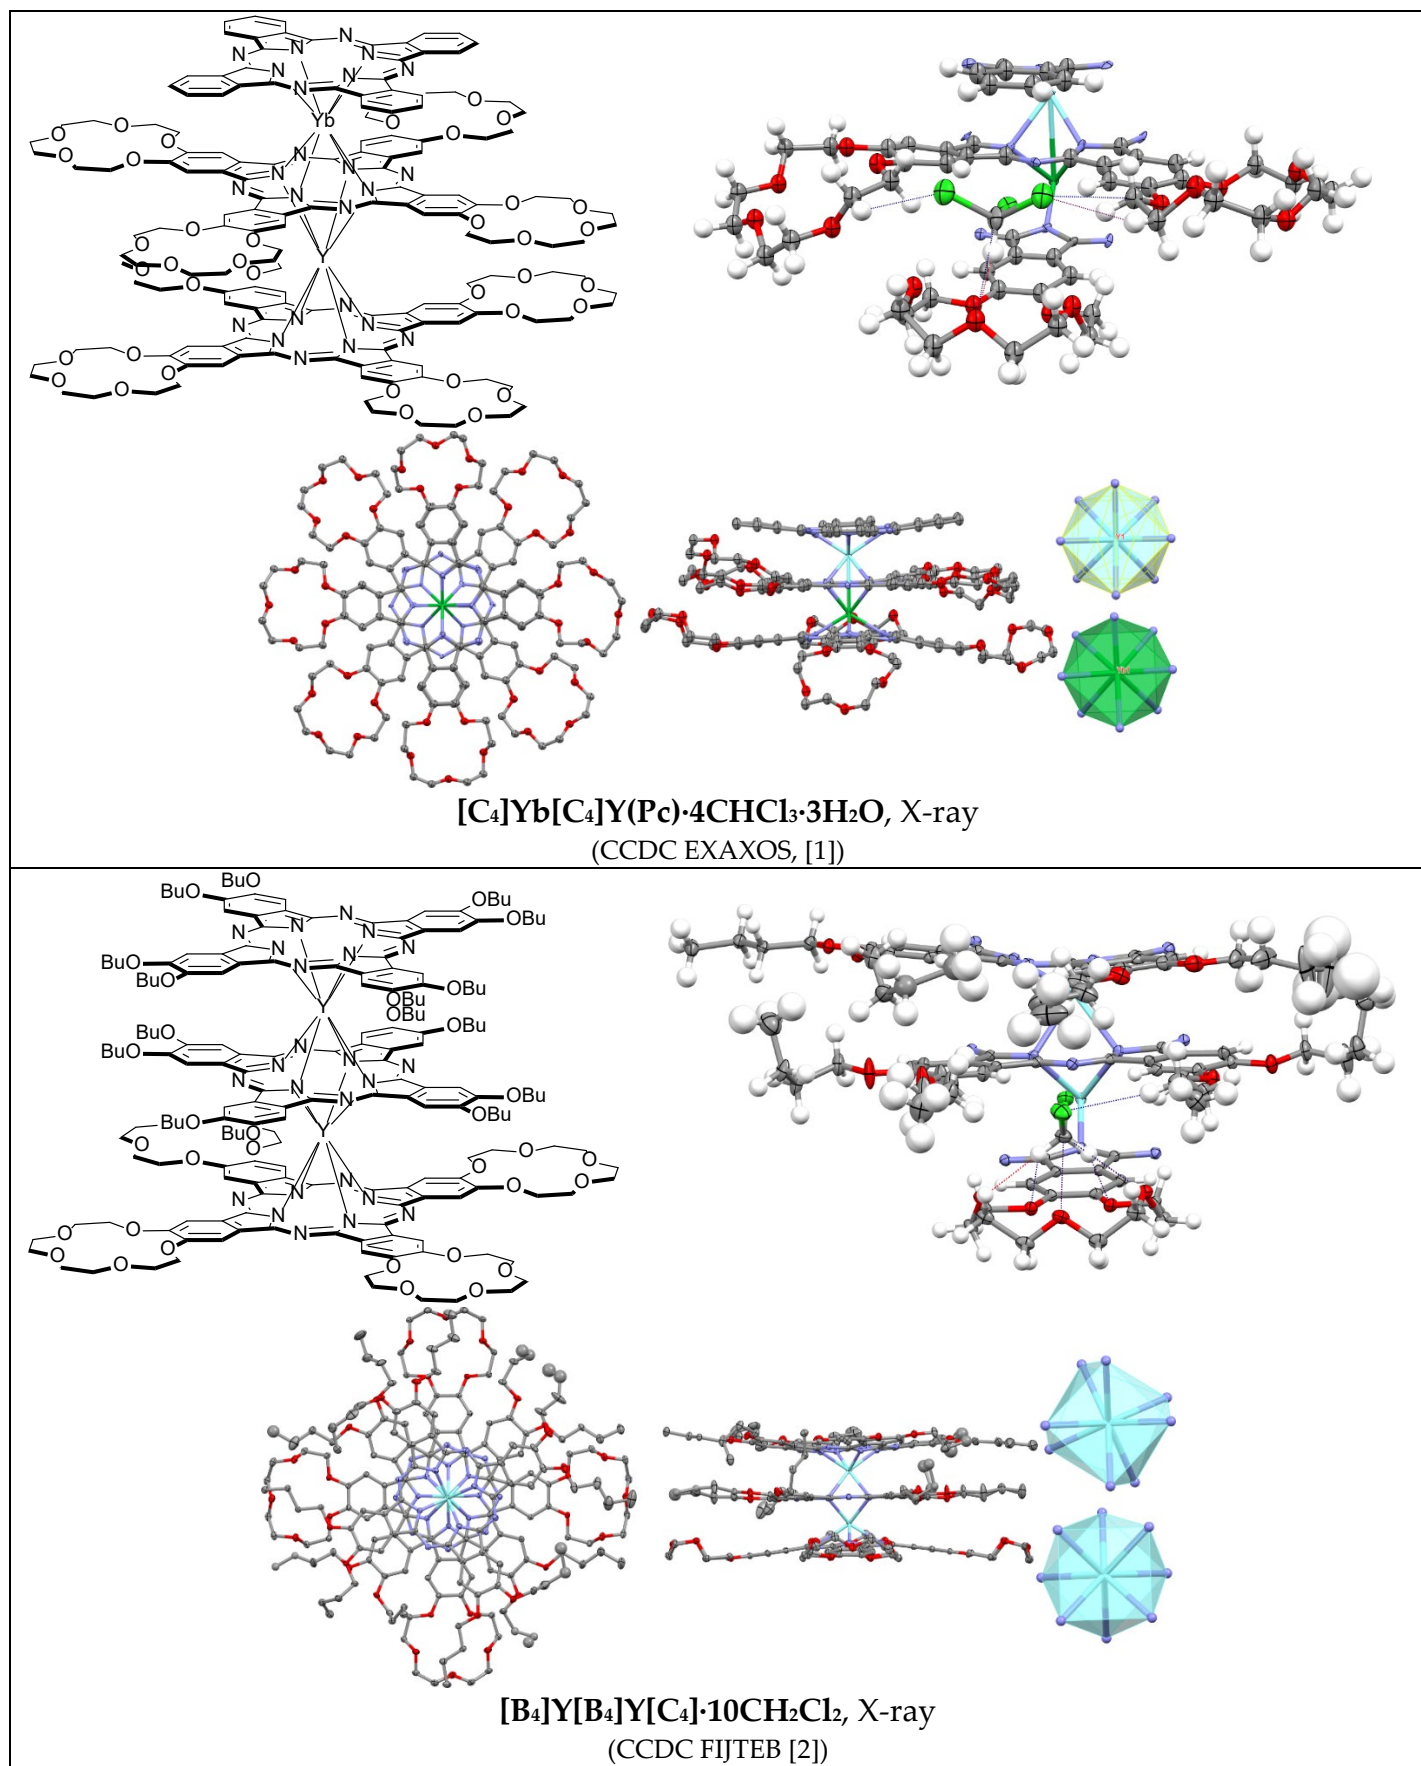

**Figure S6.** Fragments of X-ray structures of [C<sub>4</sub>]Yb[C<sub>4</sub>]Y(Pc)·4CHCl<sub>3</sub>·3H<sub>2</sub>O and [B<sub>4</sub>]Y[B<sub>4</sub>]Y[C<sub>4</sub>]·10CH<sub>2</sub>Cl<sub>2</sub>, showing the analogy in localization of solvent molecules and contacts with substituents which stabilize staggered pairwise conformations.

In both cases chlorinated solvents are sitting atop the crown-ether rings forming weak CH...O contacts with oxygen atoms of crown-ether rings and CH...Cl contacts with the substituents of the neighboring ligands which stabilizes the pairwise staggered conformation.

1. Polovkova, M.A.; Martynov, A.G.; Birin, K.P.; Nefedov, S.E.; Gorbunova, Y.G.; Tsivadze, A.Y. Determination of the Structural Parameters of Heteronuclear (Phthalocyaninato)Bis(Crownphthalocyaninato)Lanthanide(III) Triple-Deckers in Solution by Simultaneous Analysis of NMR and Single-Crystal X-Ray Data. *Inorg. Chem.* **2016**, *55*, 9258–9269, doi:10.1021/acs.inorgchem.6b01292.
2. Martynov, A.G.; Sinelshchikova, A.A.; Dorovatovskii, P. V.; Polovkova, M.A.; Ovchenkova, A.E.; Birin, K.P.; Kirakosyan, G.A.; Gorbunova, Y.G.; Tsivadze, A.Y. Solvation-Induced Conformational Switching of Trisphthalocyanates for Control of Their Magnetic Properties. *Inorg. Chem.* **2023**, *62*, 10329–10342, doi:10.1021/acs.inorgchem.3c01169.

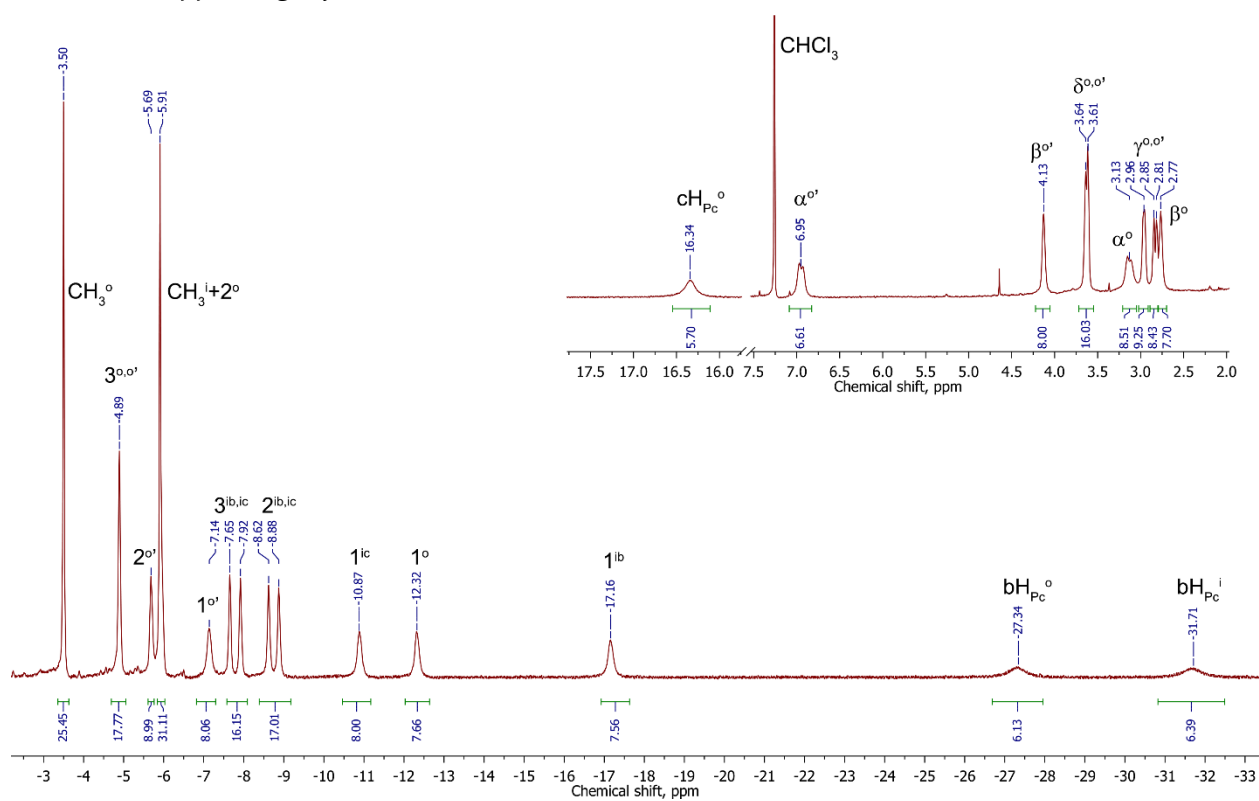

Figure S7.  $^1\text{H}$ -NMR spectrum of  $[\text{B}_4]\text{Dy}[\text{B}_4]\text{Y}[\text{C}_4]$  in  $\text{CDCl}_3$ .

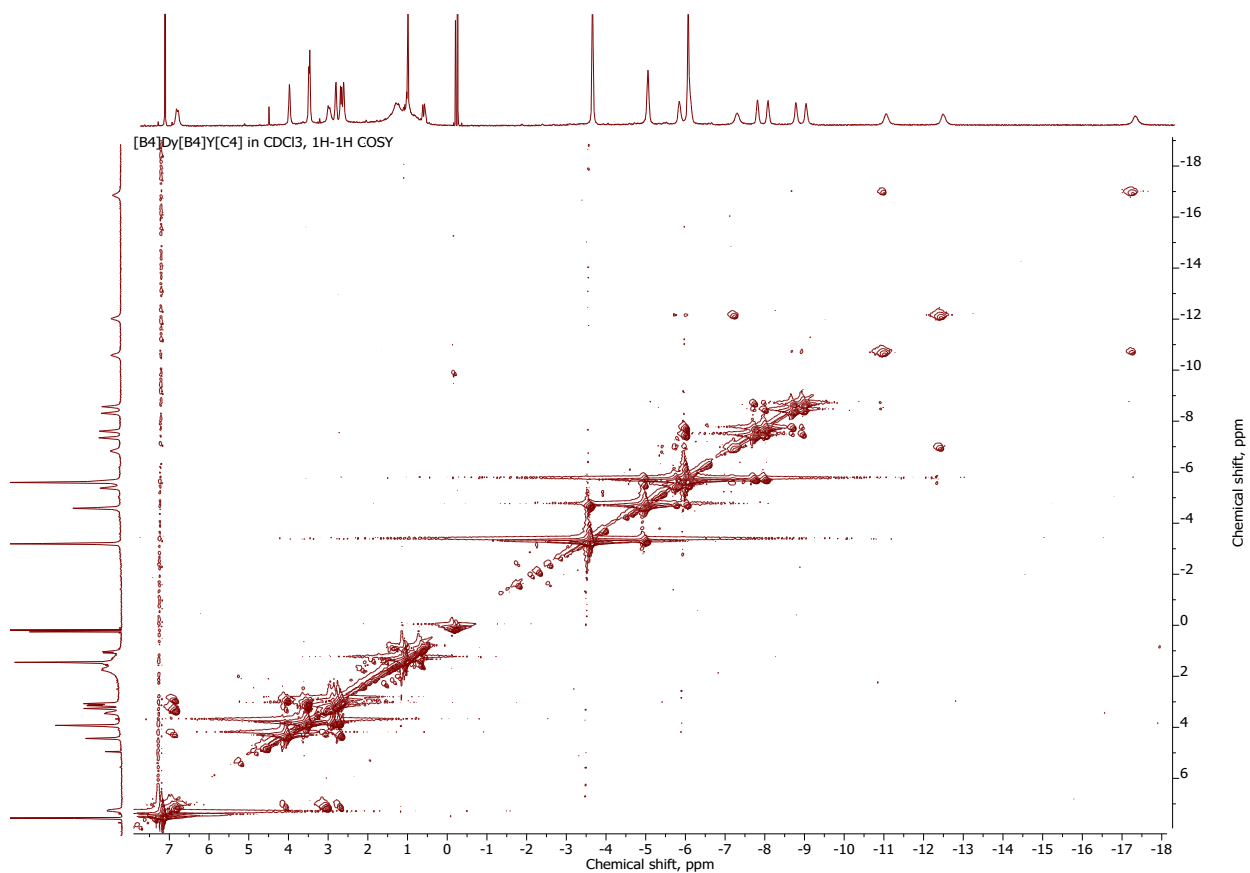

Figure S8.  $^1\text{H}$ - $^1\text{H}$  COSY spectrum of  $[\text{B}_4]\text{Dy}[\text{B}_4]\text{Y}[\text{C}_4]$  in  $\text{CDCl}_3$ .

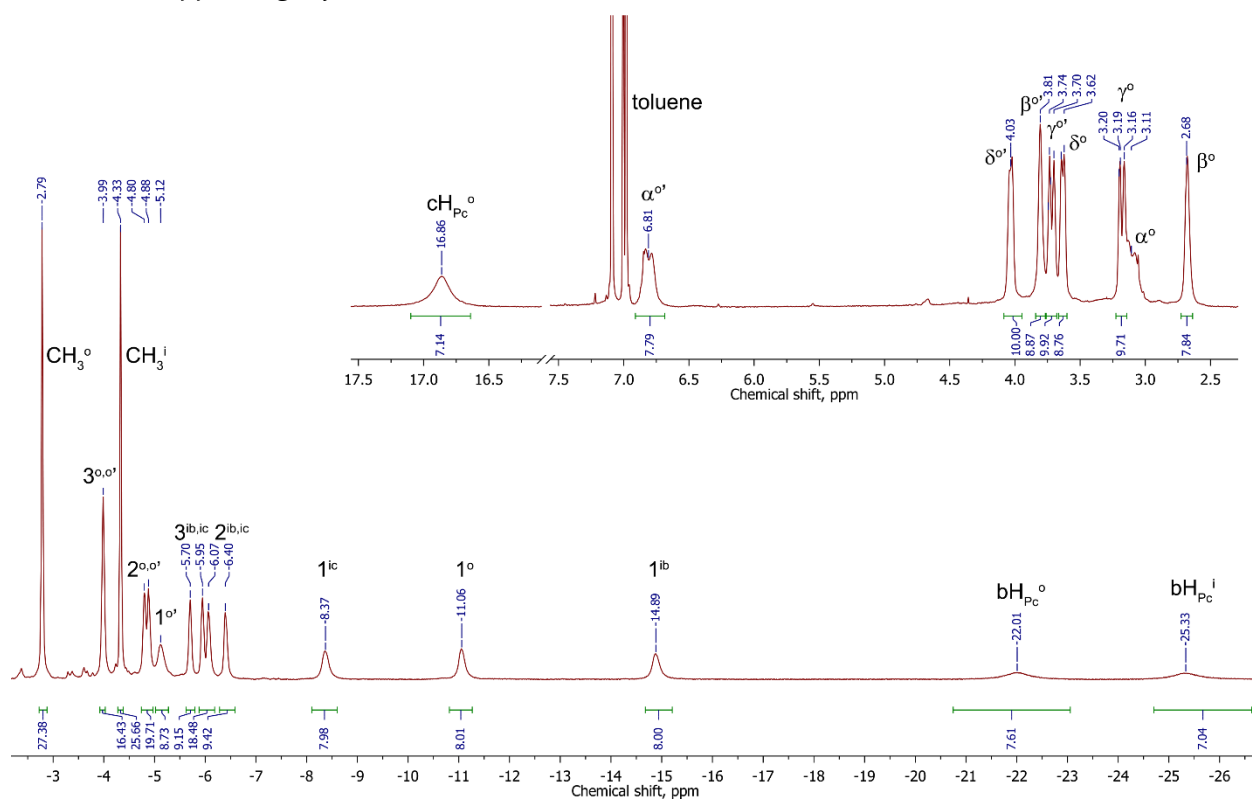

Figure S9.  $^1\text{H}$ -NMR spectrum of  $[\text{B}_4]\text{Dy}[\text{B}_4]\text{Y}[\text{C}_4]$  in  $\text{toluene-d}_8$ .

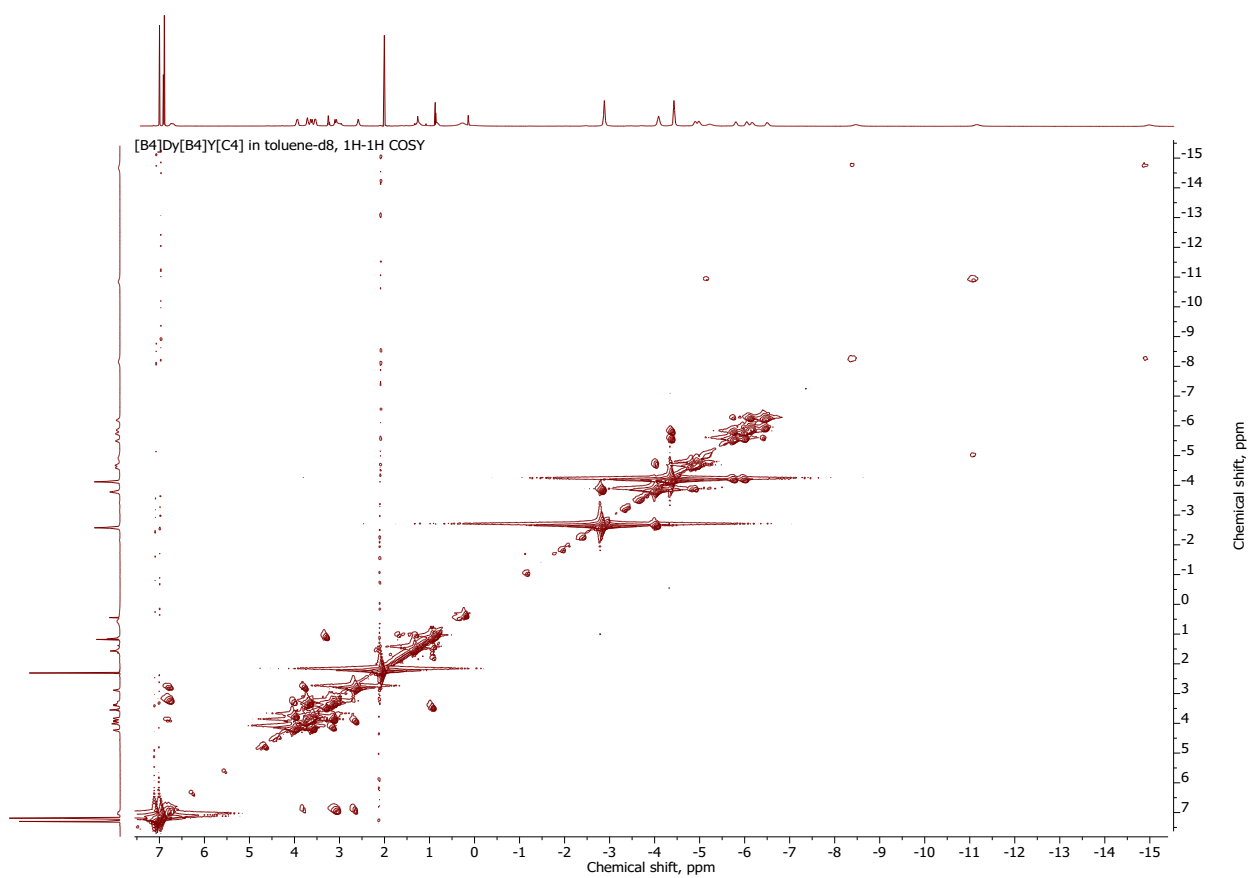

Figure S10.  $^1\text{H}$ - $^1\text{H}$  COSY spectrum of  $[\text{B}_4]\text{Dy}[\text{B}_4]\text{Y}[\text{C}_4]$  in  $\text{toluene-d}_8$ .



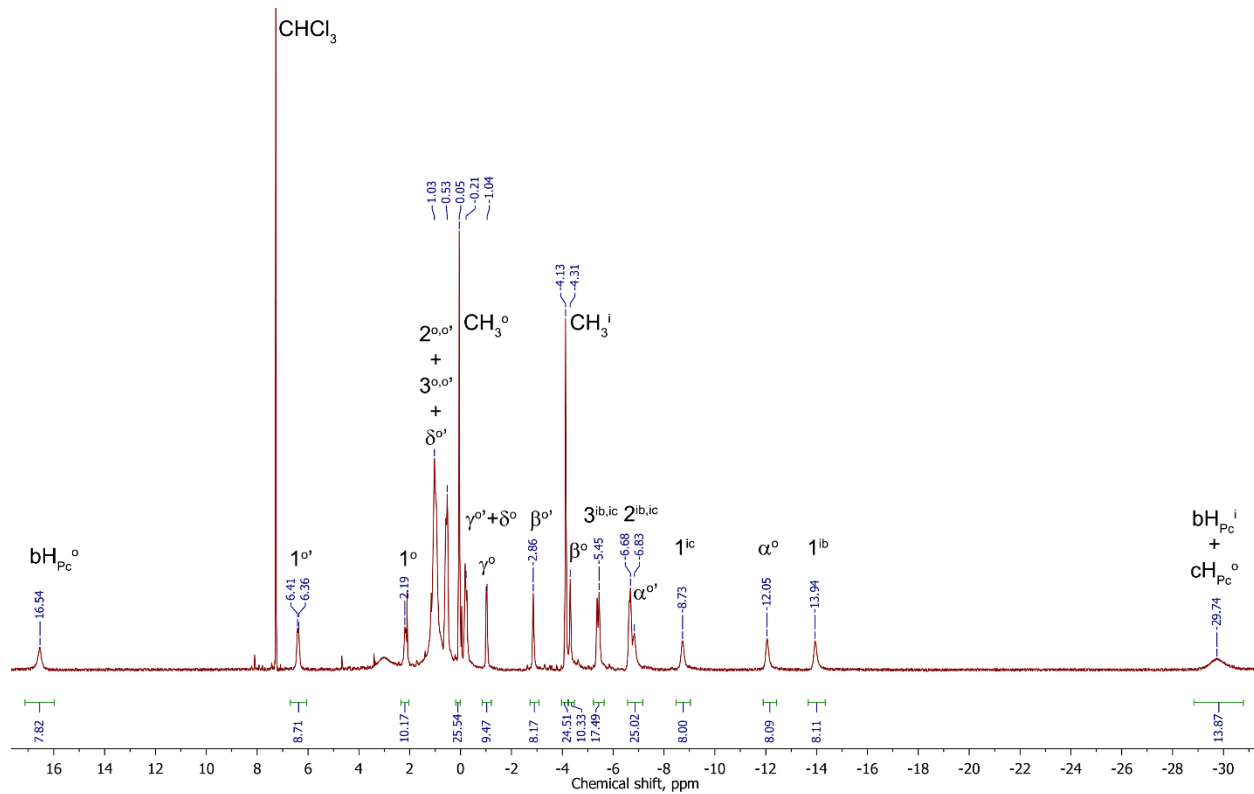

Figure S11.  $^1\text{H}$ -NMR spectrum of  $[\text{B}_4]\text{Y}[\text{B}_4]\text{Dy}[\text{C}_4]$  in  $\text{CDCl}_3$ .

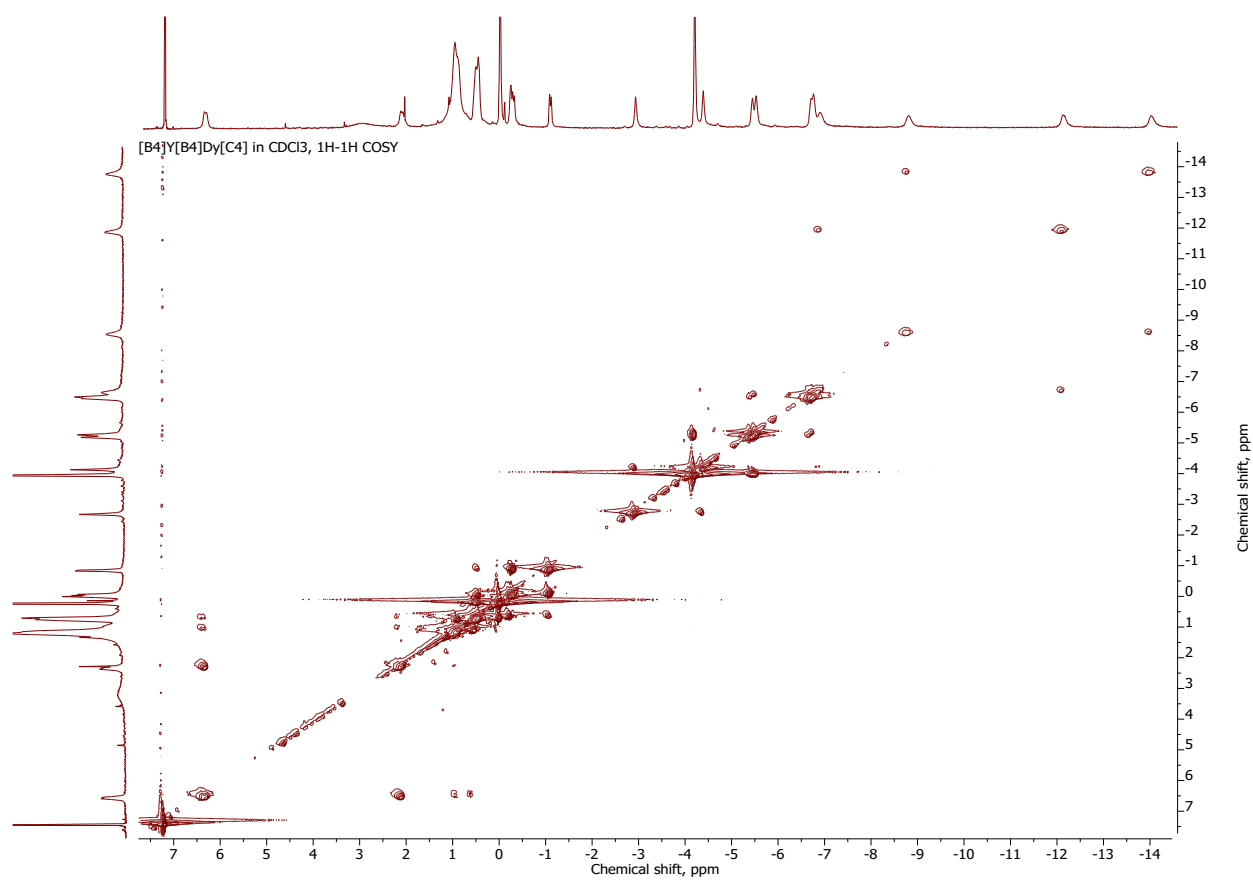

Figure S12.  $^1\text{H}$ - $^1\text{H}$  COSY spectrum of  $[\text{B}_4]\text{Y}[\text{B}_4]\text{Dy}[\text{C}_4]$  in  $\text{CDCl}_3$ .

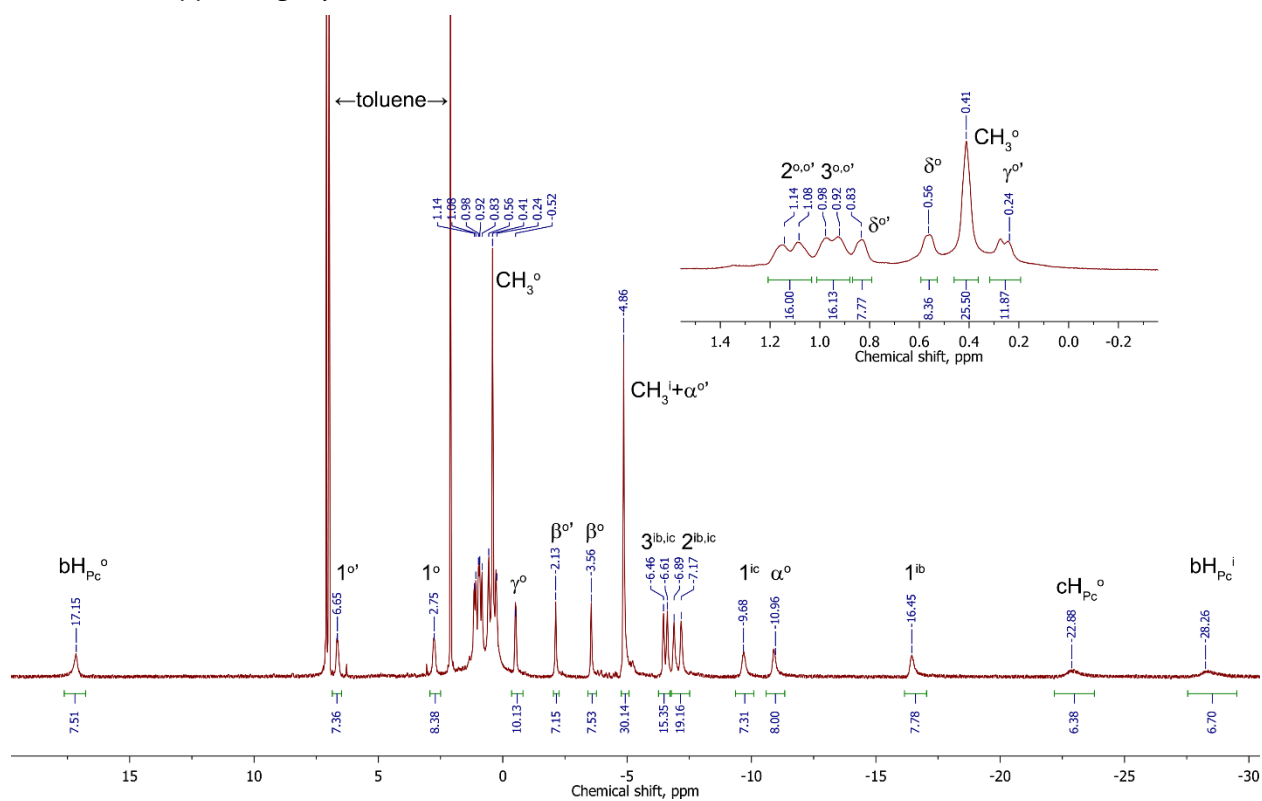

Figure S13.  $^1\text{H}$ -NMR spectrum of  $[\text{B}_4]\text{Y}[\text{B}_4]\text{Dy}[\text{C}_4]$  in toluene- $\text{d}_8$ .

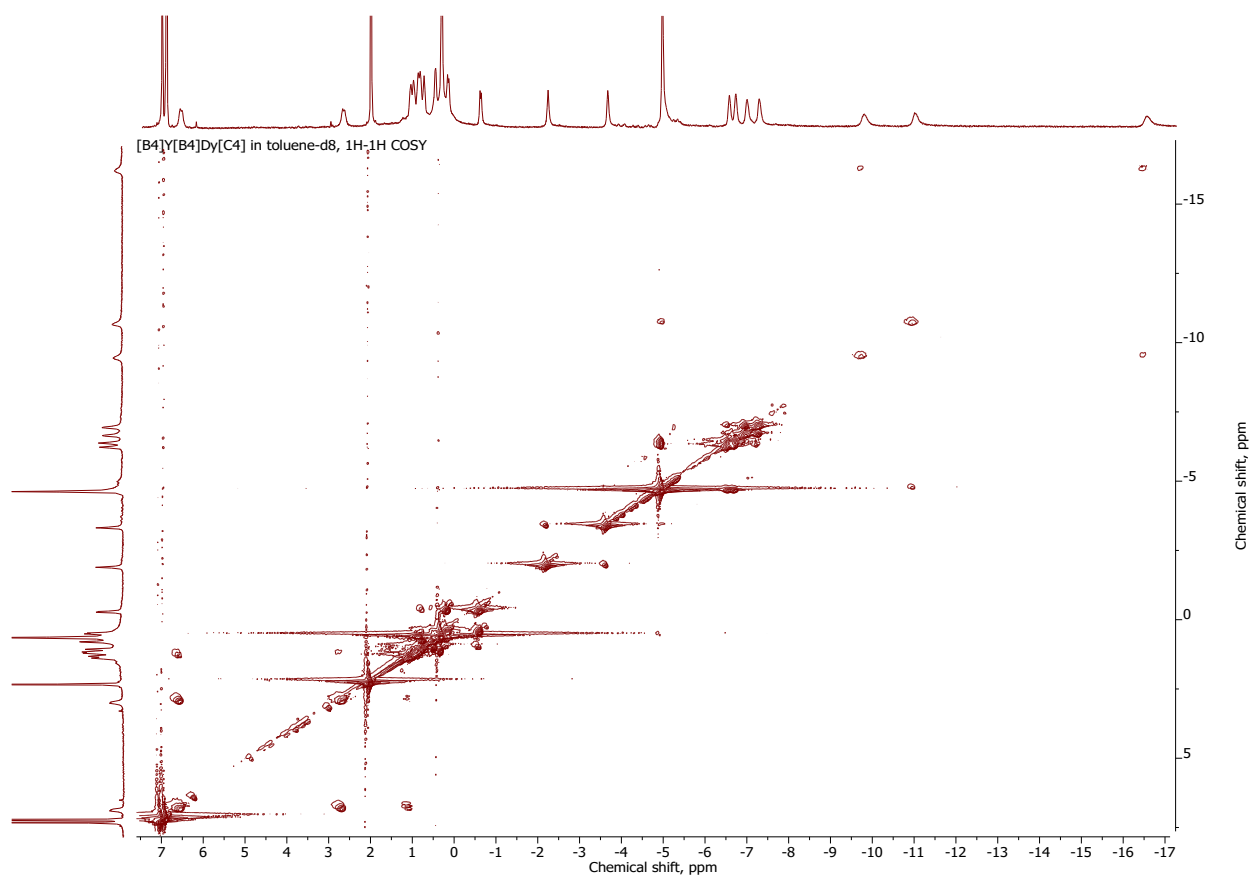

Figure S14.  $^1\text{H}$ - $^1\text{H}$  COSY spectrum of  $[\text{B}_4]\text{Y}[\text{B}_4]\text{Dy}[\text{C}_4]$  in toluene- $\text{d}_8$ .

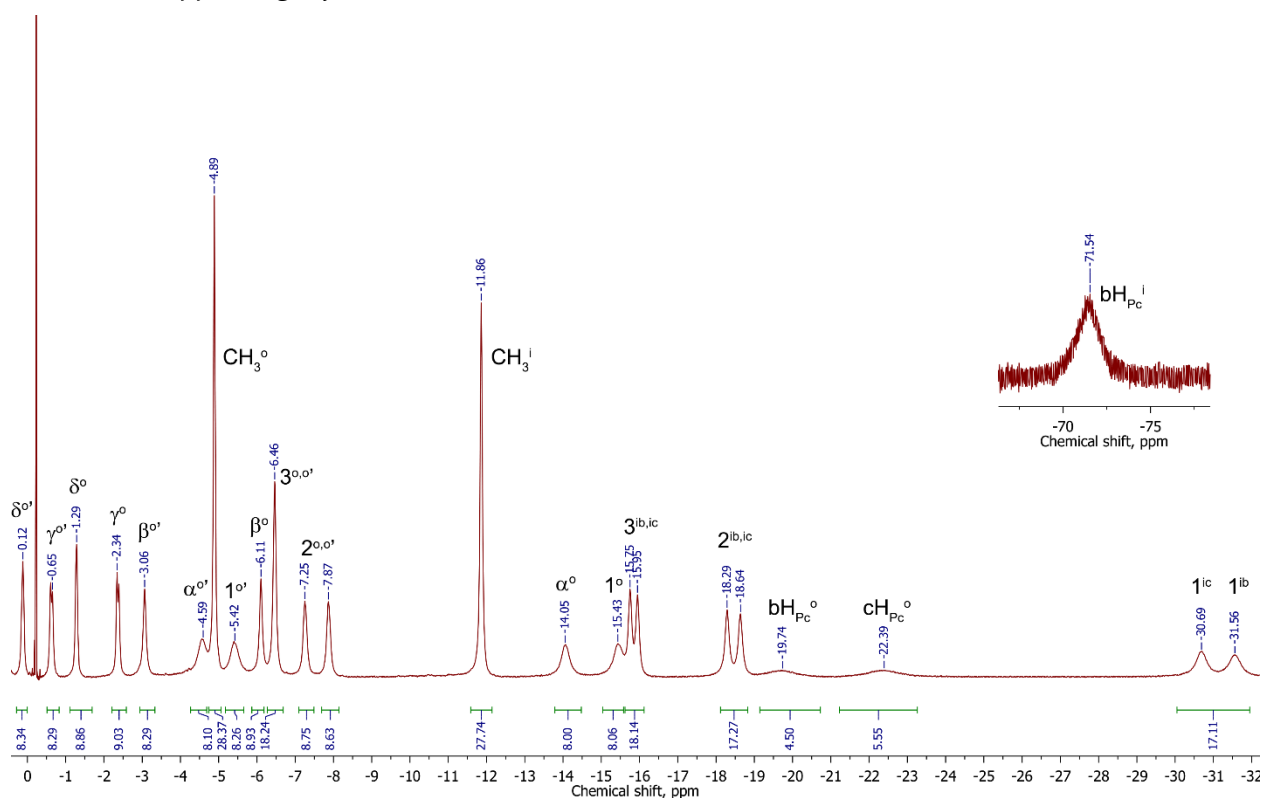

Figure S15.  $^1\text{H}$ -NMR spectrum of  $[\text{B}_4]\text{Dy}[\text{B}_4]\text{Dy}[\text{C}_4]$  in  $\text{CDCl}_3$ .

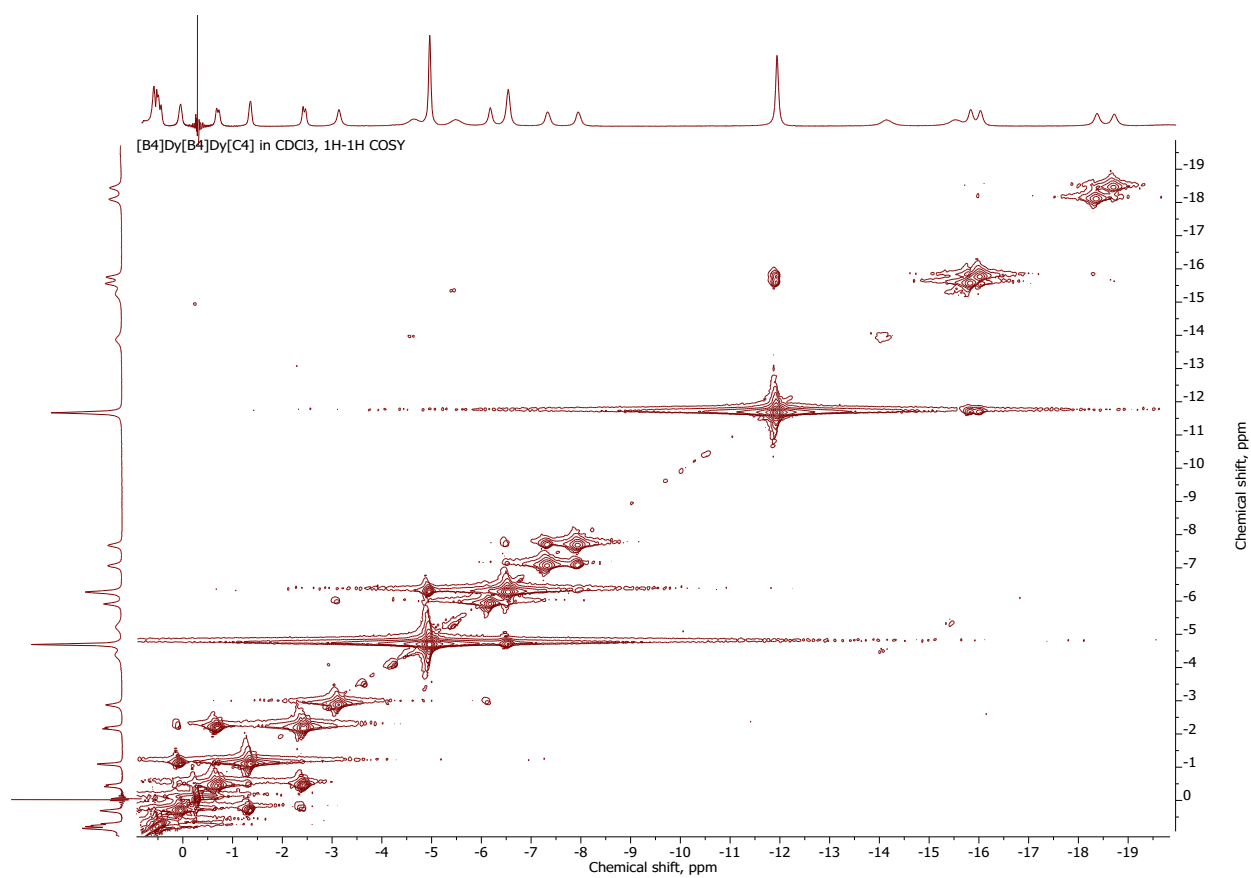

Figure S16.  $^1\text{H}$ - $^1\text{H}$  COSY spectrum of  $[\text{B}_4]\text{Dy}[\text{B}_4]\text{Dy}[\text{C}_4]$  in  $\text{CDCl}_3$ .

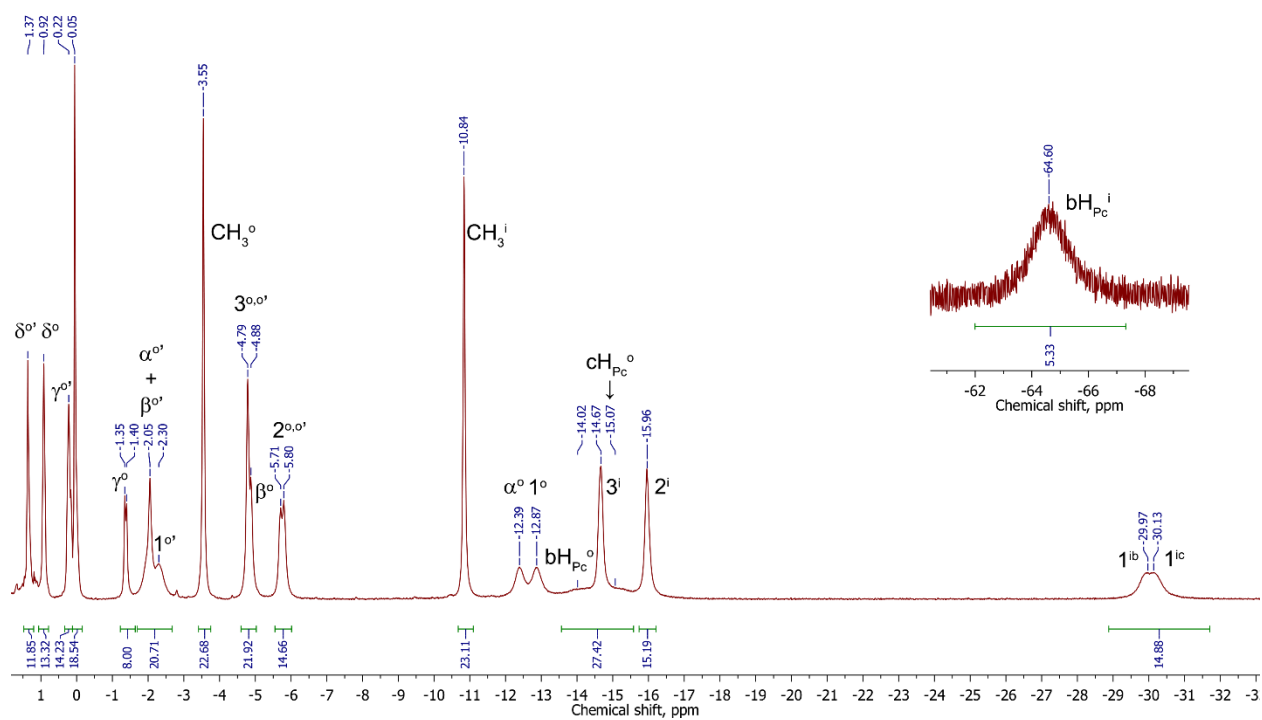

Figure S17. <sup>1</sup>H-NMR spectrum of [B<sub>4</sub>]Dy[B<sub>4</sub>]Dy[C<sub>4</sub>] in toluene-d<sub>8</sub>.

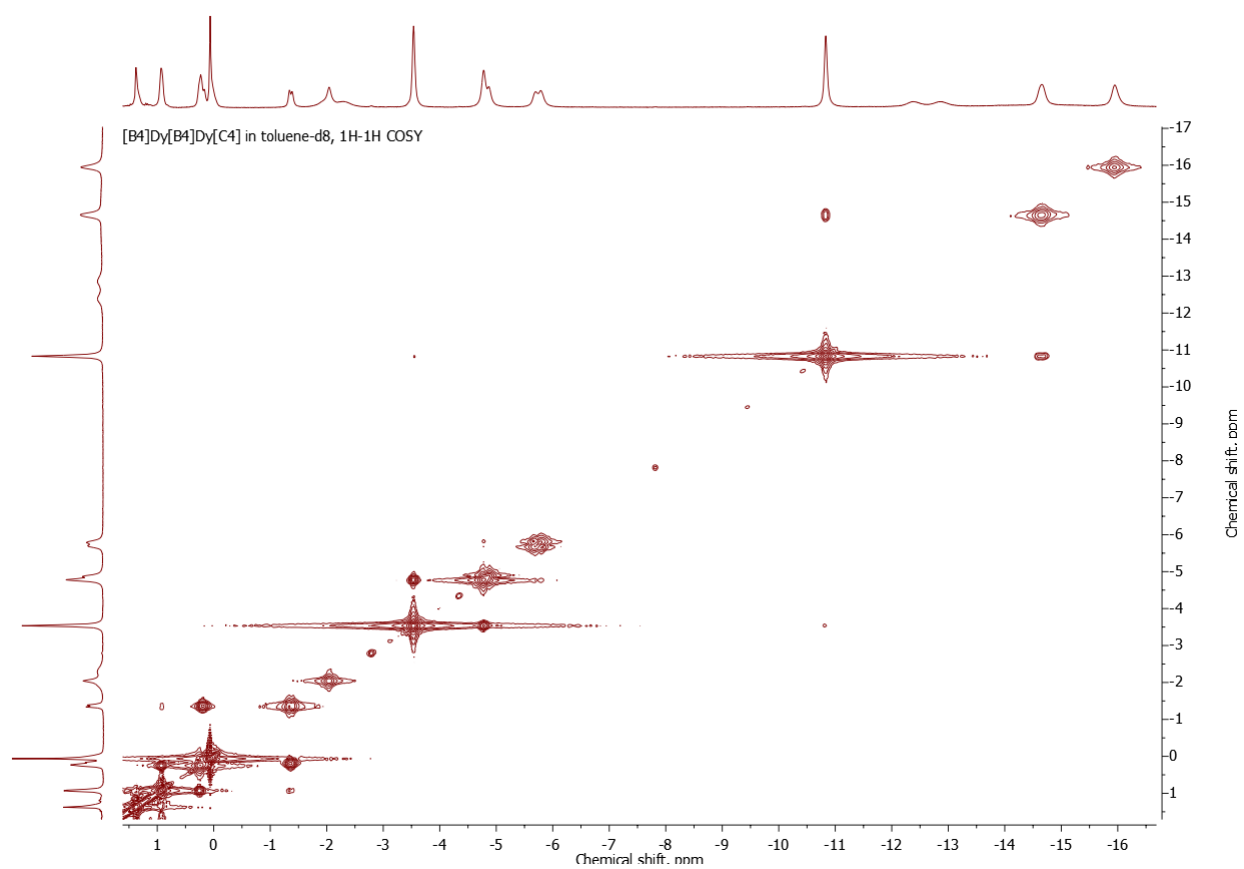

Figure S18. <sup>1</sup>H-<sup>1</sup>H COSY spectrum of [B<sub>4</sub>]Dy[B<sub>4</sub>]Dy[C<sub>4</sub>] in toluene-d<sub>8</sub>.

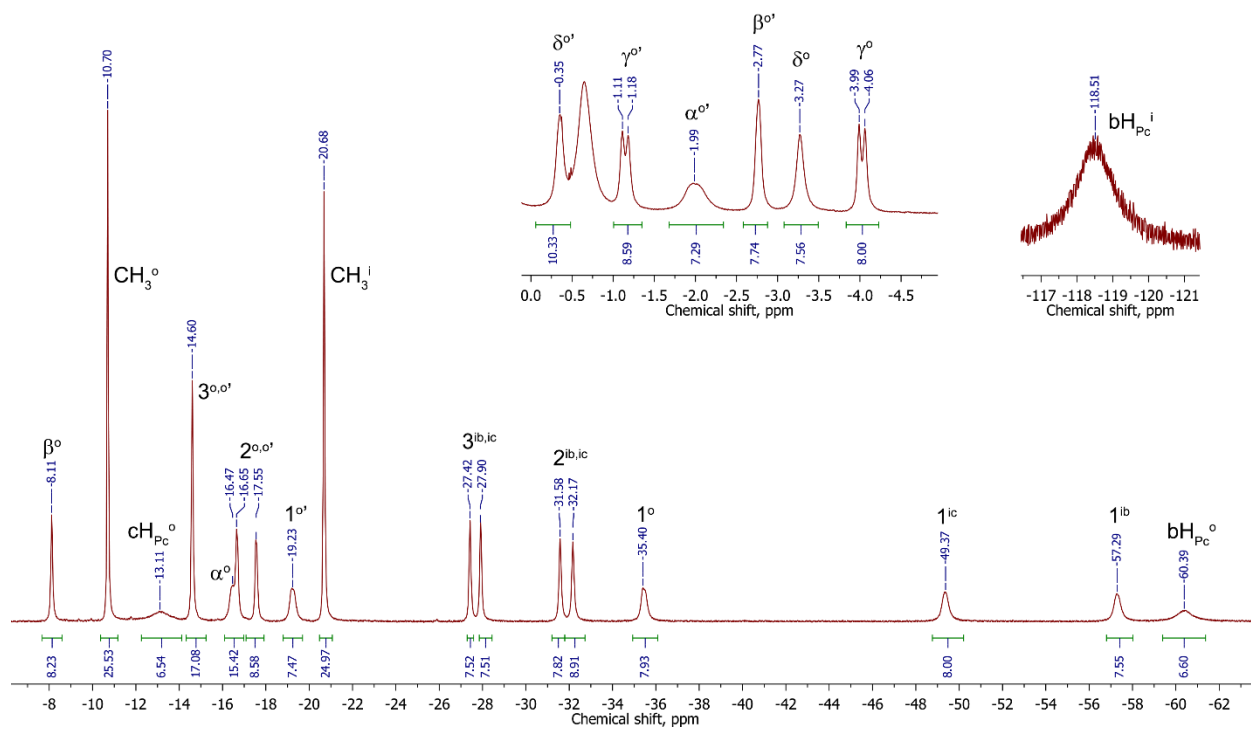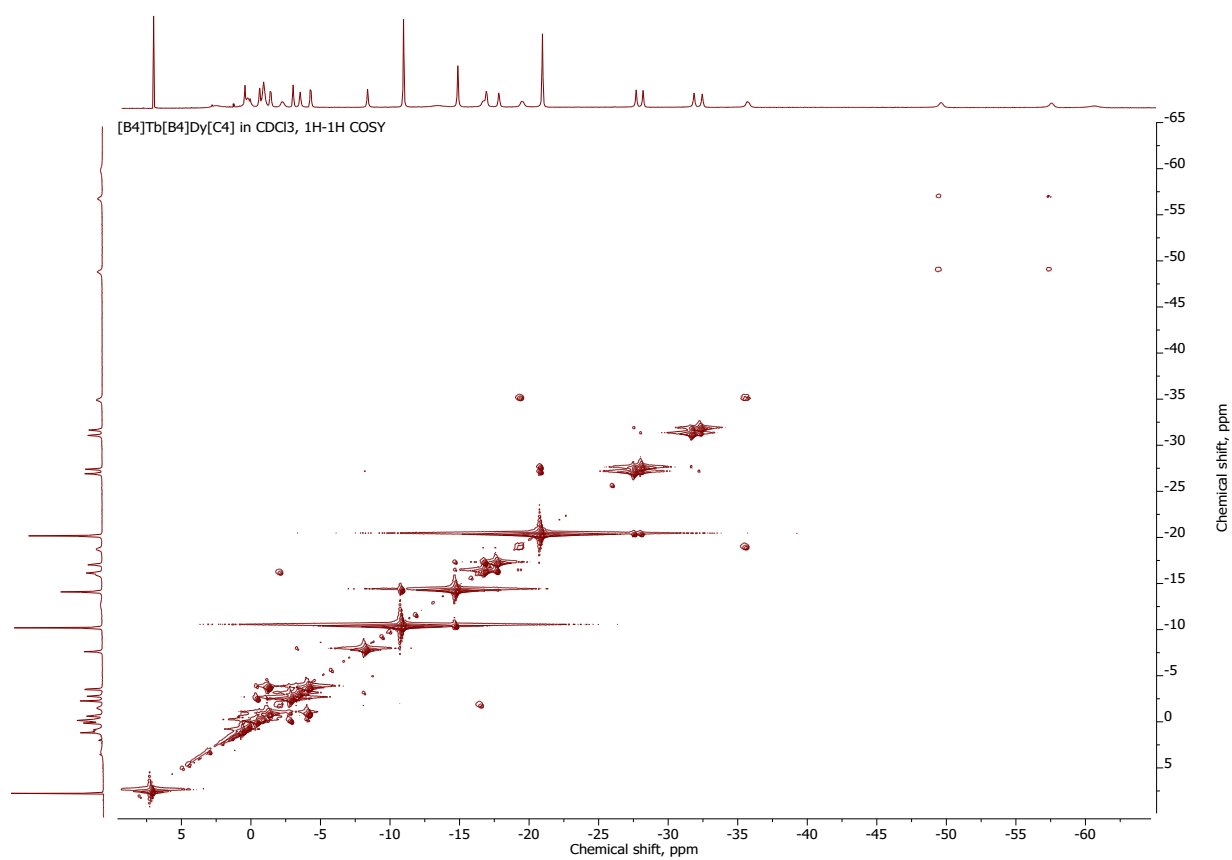

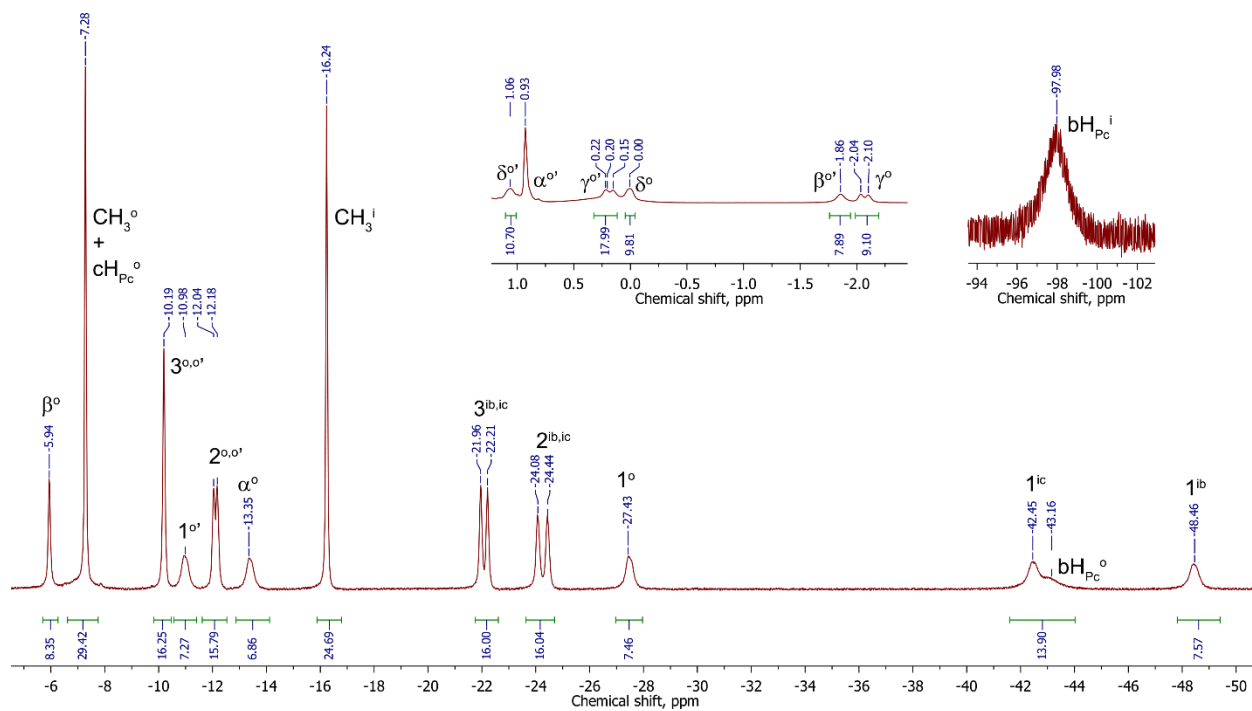

Figure S21.  $^1\text{H}$ -NMR spectrum of  $[\text{B}_4]\text{Tb}[\text{B}_4]\text{Dy}[\text{C}_4]$  in toluene- $\text{d}_8$ .

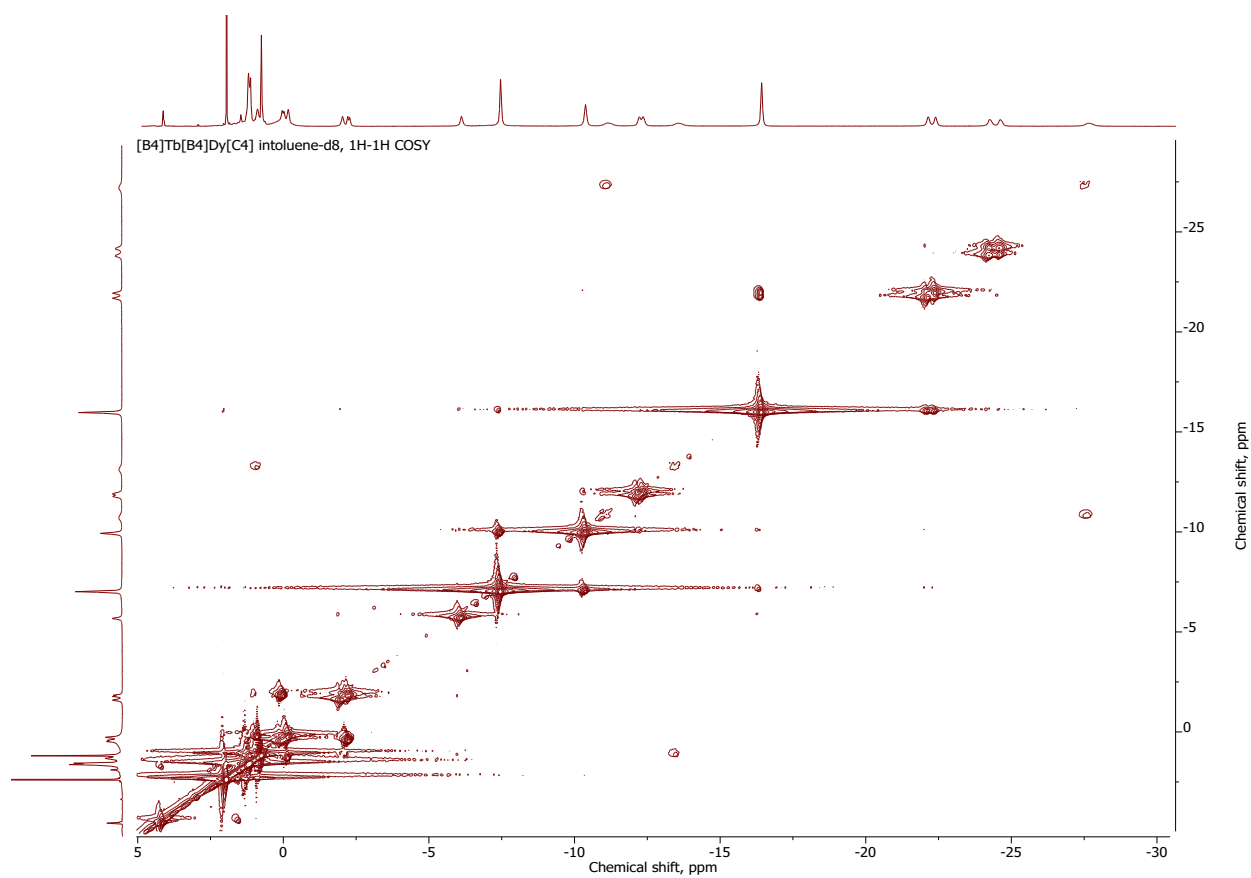

Figure S22.  $^1\text{H}$ - $^1\text{H}$  COSY spectrum of  $[\text{B}_4]\text{Tb}[\text{B}_4]\text{Dy}[\text{C}_4]$  in toluene- $\text{d}_8$ .

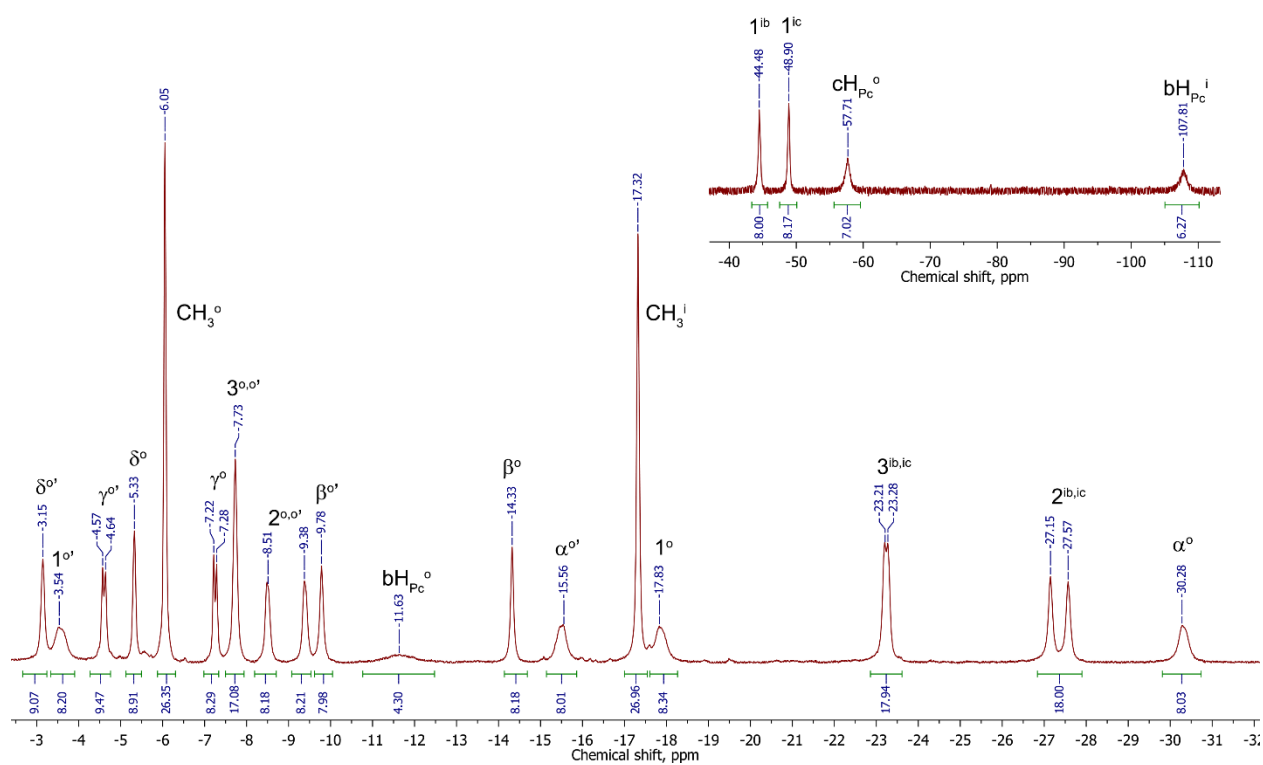

Figure S23.  $^1\text{H}$ -NMR spectrum of  $[\text{B}_4]\text{Dy}[\text{B}_4]\text{Tb}[\text{C}_4]$  in  $\text{CDCl}_3$ .

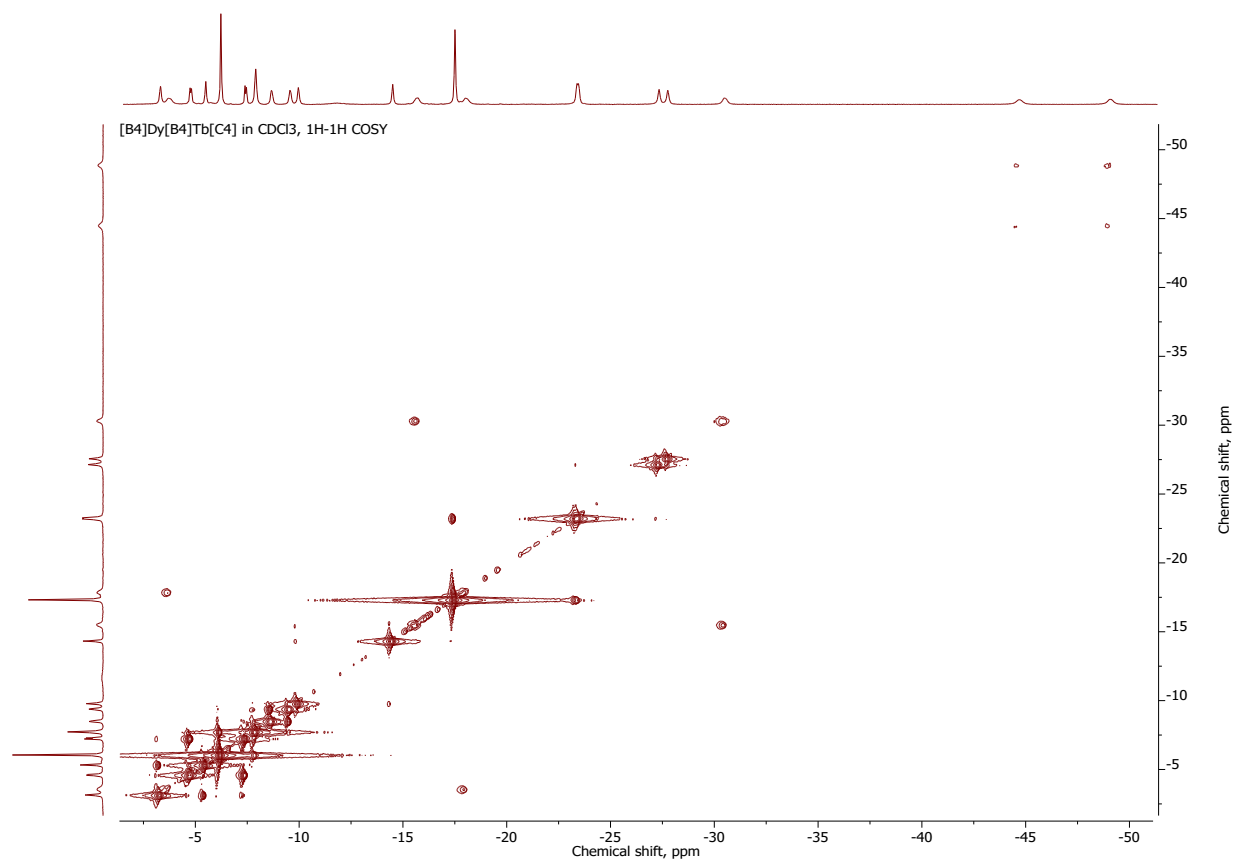

Figure S24.  $^1\text{H}$ - $^1\text{H}$  COSY spectrum of  $[\text{B}_4]\text{Dy}[\text{B}_4]\text{Tb}[\text{C}_4]$  in  $\text{CDCl}_3$ .

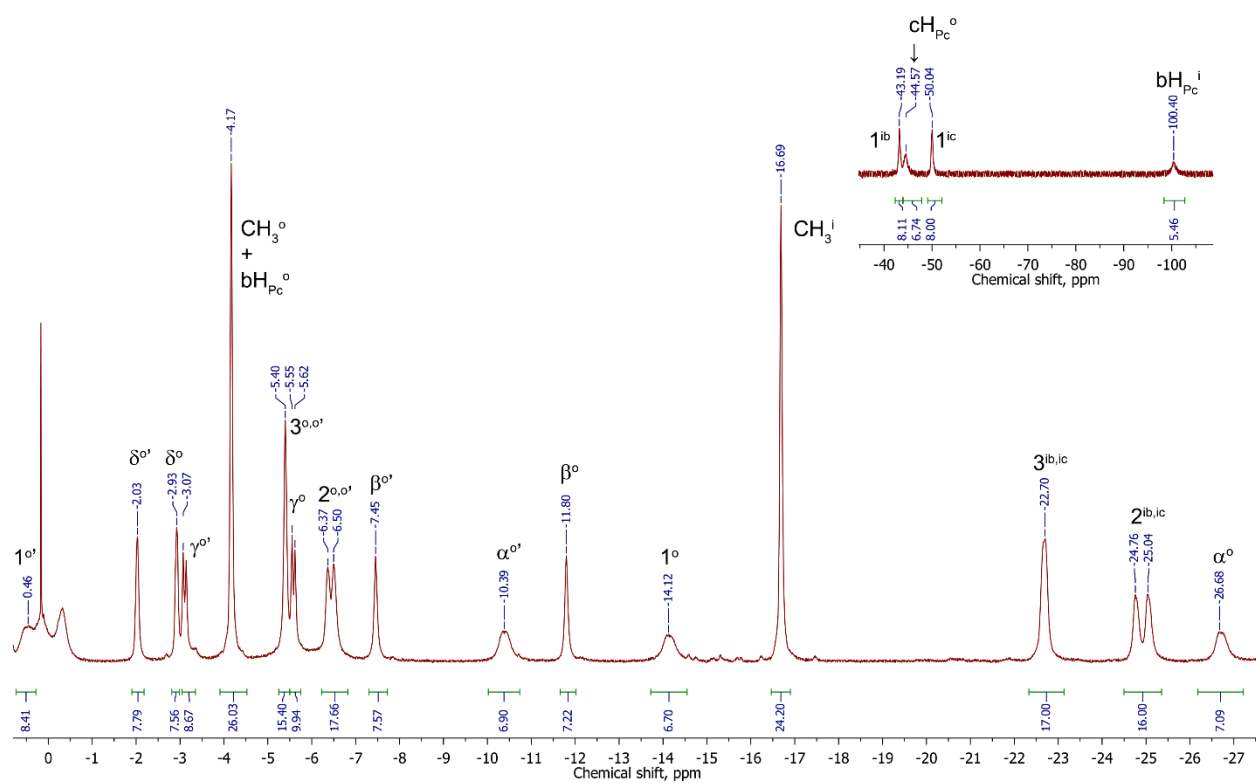

Figure S25.  $^1\text{H}$ -NMR spectrum of  $[\text{B}_4]\text{Dy}[\text{B}_4]\text{Tb}[\text{C}_4]$  in toluene- $\text{d}_8$ .

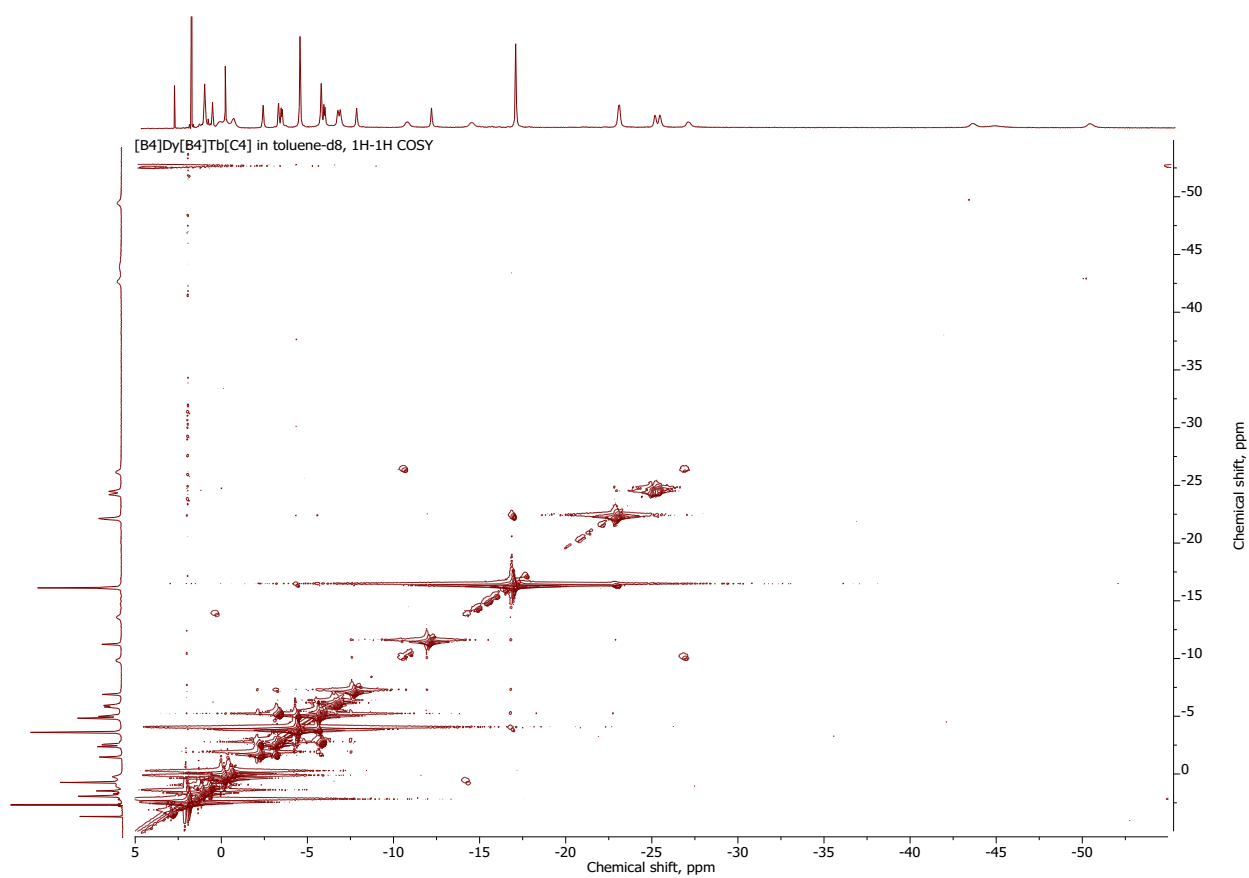

Figure S26.  $^1\text{H}$ - $^1\text{H}$  COSY spectrum of  $[\text{B}_4]\text{Dy}[\text{B}_4]\text{Tb}[\text{C}_4]$  in toluene- $\text{d}_8$ .
